# Supplementary material
Source: publisher figshare collection journal article supplement (https://tandf.figshare.com/ndownloader/files/39775115)
Supplement: Supplementary file 1 [file 39775115]

Archive with 1 entries (1 files):
- 39775115.out
